# Supplementary material for: Whole-genome plasma sequencing reveals focal amplifications as a driving force in metastatic prostate cancer
Source: PubMed Central journal article supplement (PMC4917969; doi:10.1038/ncomms12008), 2016-06-22
Supplement: ncomms12008-s1.pdf [file ncomms12008-s1.pdf]

## Supplementary Figures

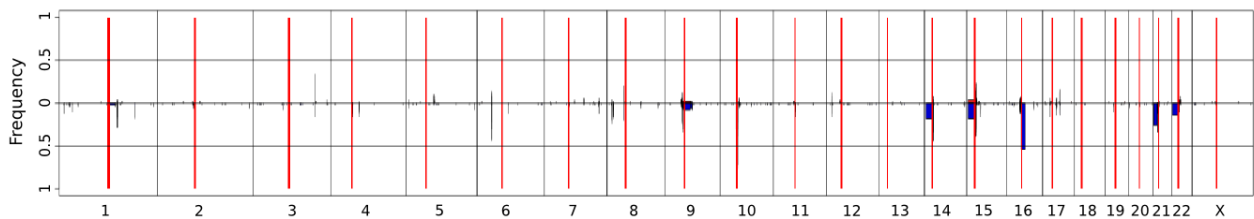

### Supplementary Figure 1

#### Plasma-Seq conducted with blood from male individuals without cancer.

Copy number patterns established from plasma samples of male individuals without cancer ( $n=50$ ). Chromosome positions are indicated along the X-axis, the Y-axis represents relative abundance of respective aberrations in percentage. The averages of gained and lost regions were 0.1% and 0.5% after removing centromeric regions (indicated as red bars), respectively, which were either homologue regions in the vicinity of repetitive regions (e.g. centromeres) or likely constitutional CNVs present in the germline.

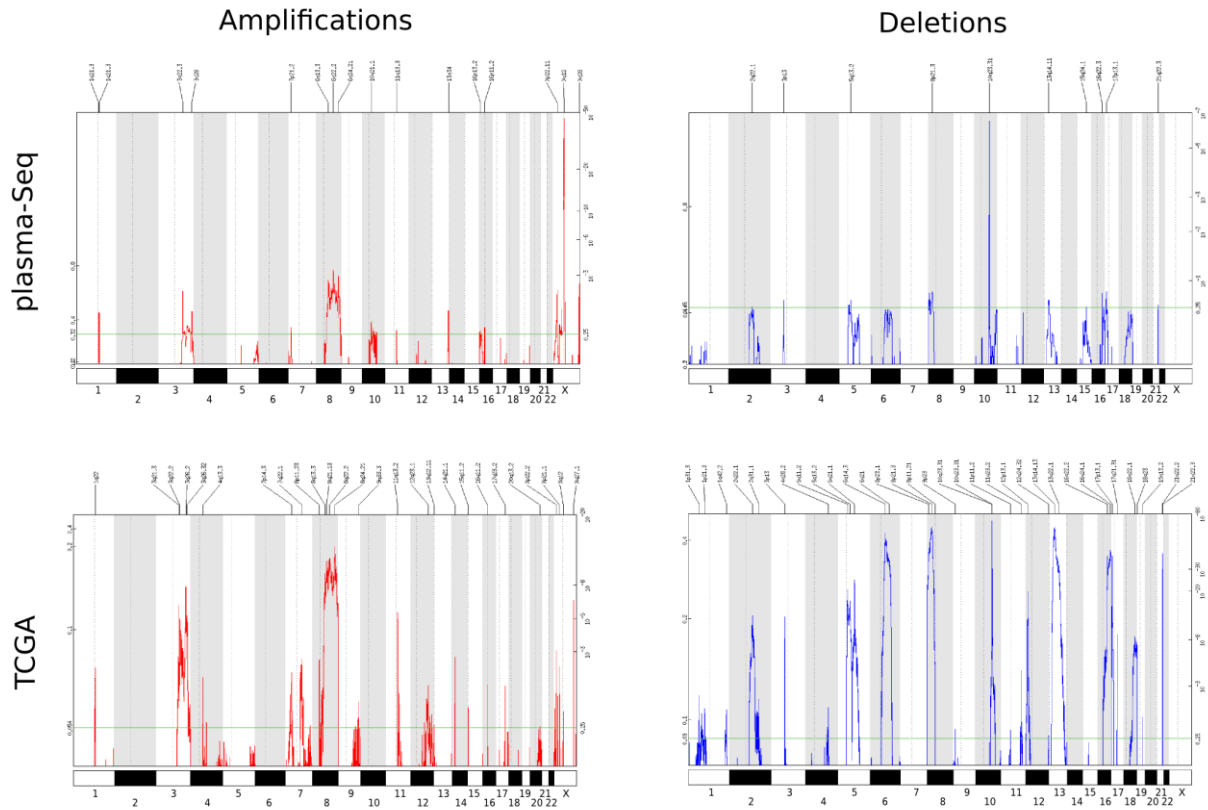

## Supplementary Figure 2

### GISTIC (genomic identification of significant targets in cancer) analyses.

GISTIC analyses of the TCGA and plasma samples: Amplifications are illustrated in red and deletions in blue. Chromosome positions are indicated along the X-axis. Significance thresholds are indicated by the green lines, the statistical significance of the aberrations is displayed as false discovery rate (FDR) q values on the Y-axis.

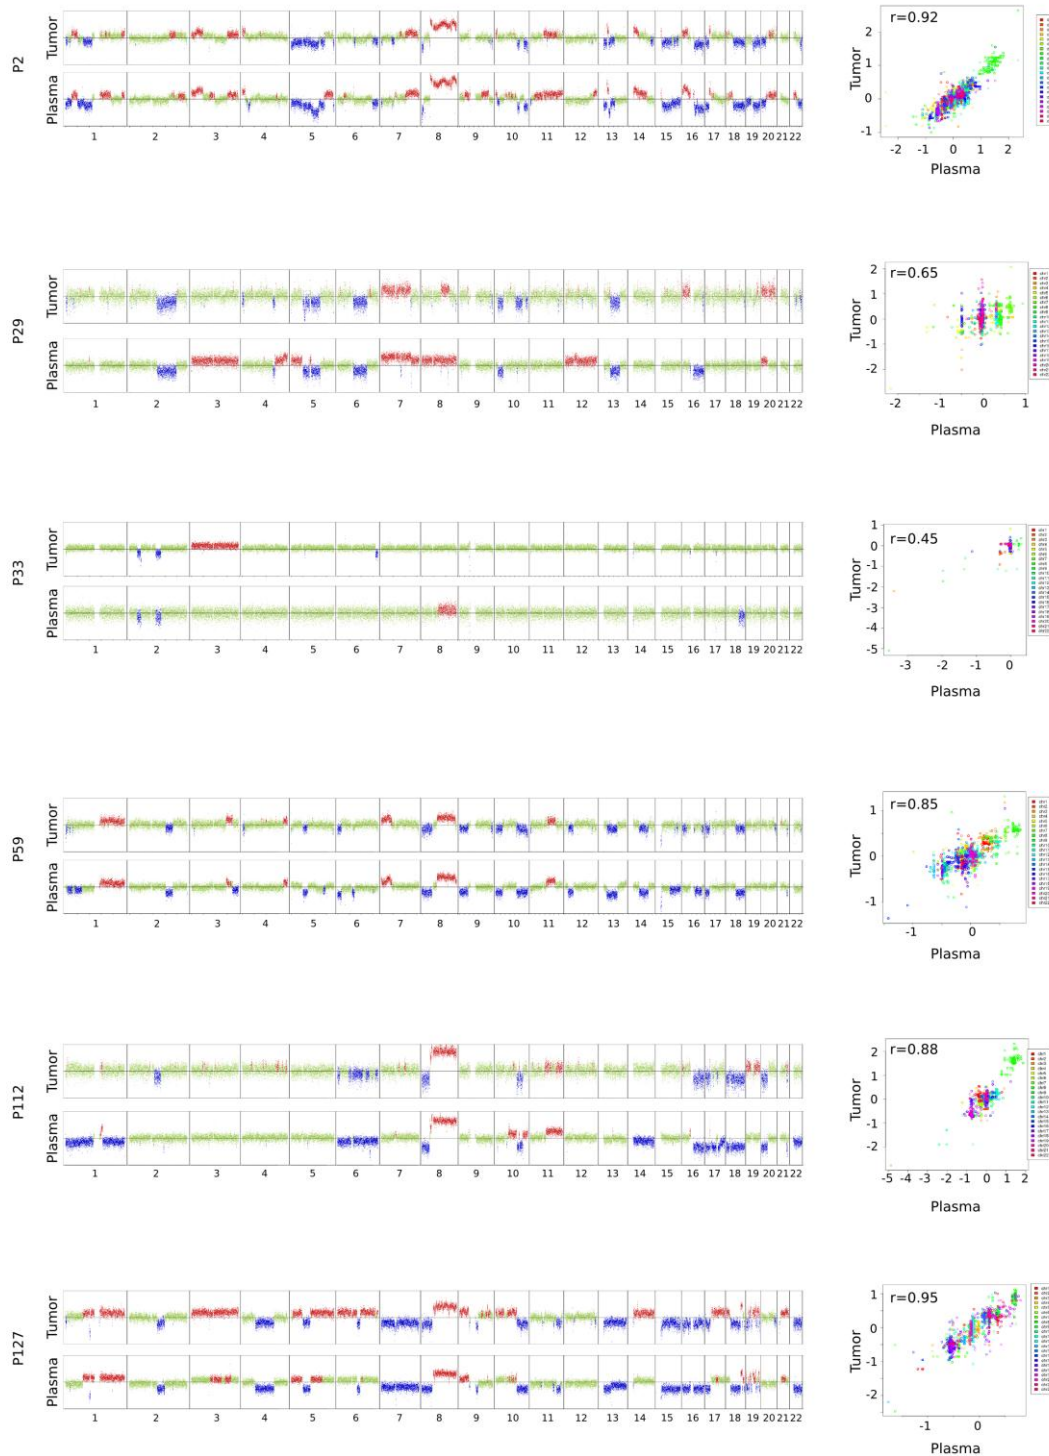

### Supplementary Figure 3

#### Head to head comparisons between plasma and tissue samples.

A pairwise comparison of genomic position-mapped profiles between plasma and tissue samples revealed strong correlations in cases P2 (Pearson correlation coefficient: 0.92), P59 (Pearson correlation coefficient: 0.85), P112 (Pearson correlation coefficient: 0.88), and P127

(Pearson correlation coefficient: 0.95), and low correlations in cases P29 (Pearson correlation coefficient: 0.65) and P33 (Pearson correlation coefficient: 0.45).

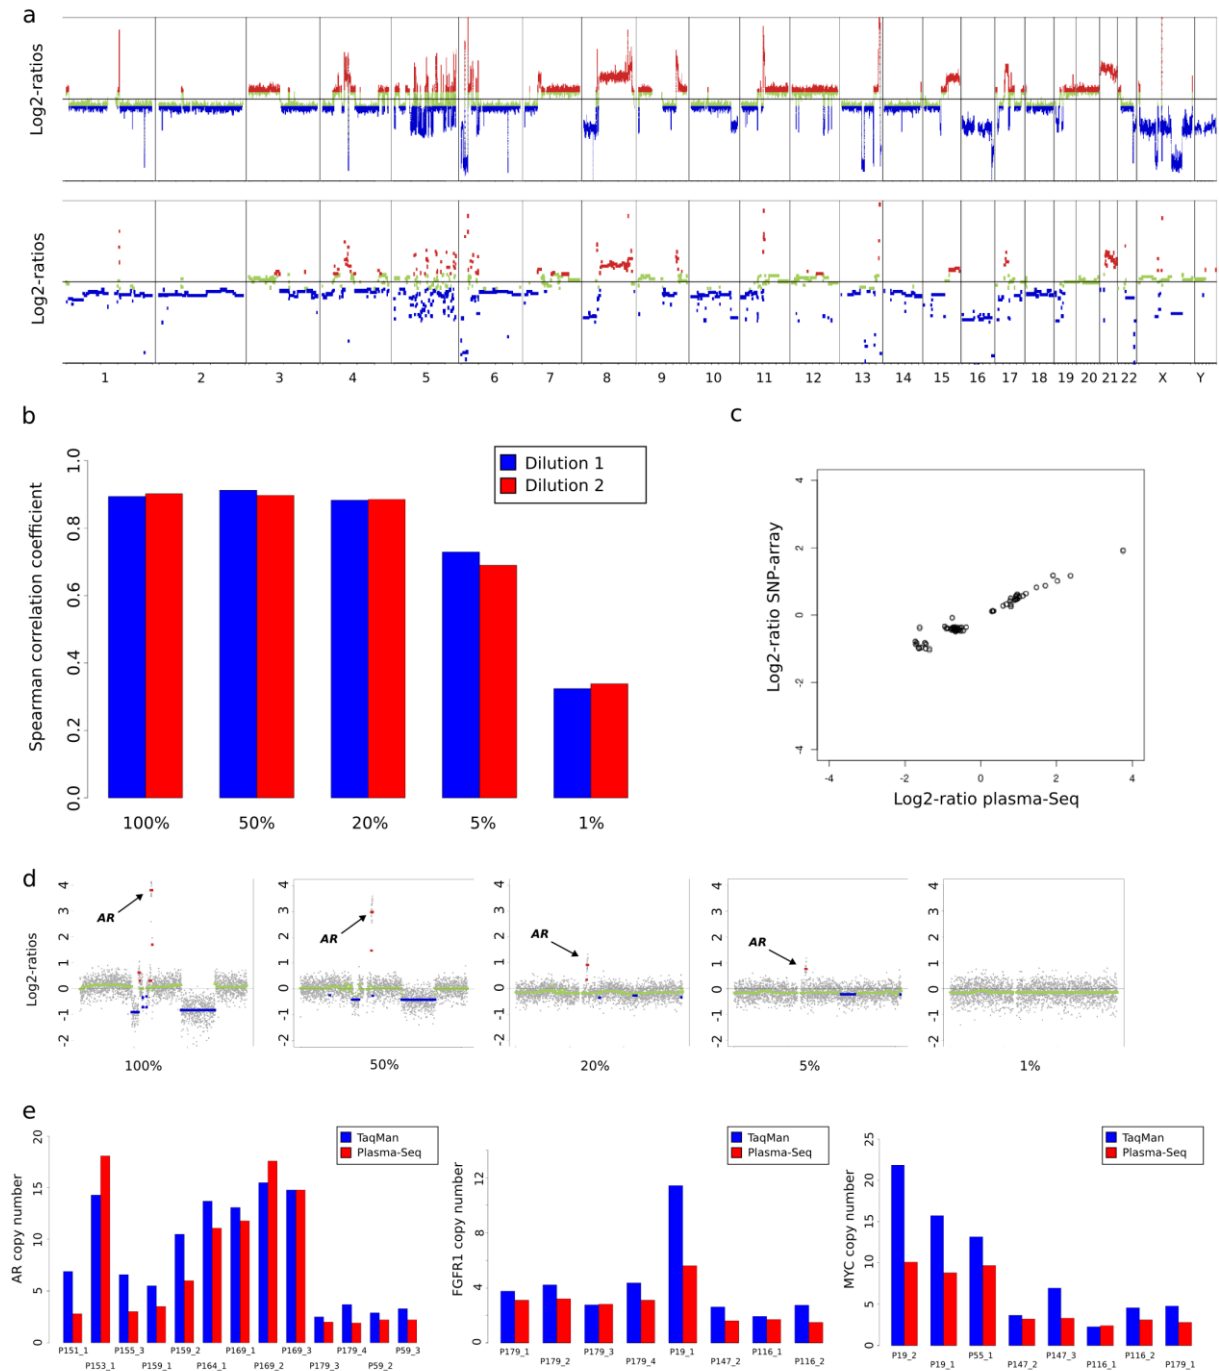

## Supplementary Figure 4

### Definition of focal SCNAs and detection limits.

(a) Copy number profiles obtained with undiluted VCaP DNA employing the CytoScan HD SNP-array (top) and whole-genome sequencing of VCaP (bottom).

(b) Correlation coefficients (Spearman correlation) obtained by comparison of log<sub>2</sub>-ratios of focal events identified in undiluted VCaP DNA between whole-genome sequencing and the CytoScan HD SNP-array of two biological replicates (shown in blue and red, respectively) with various dilutions of cell line VCaP.

(c) Scatter plot with copy numbers (inferred from log<sub>2</sub>-ratios) obtained with CytoScan HD SNP-array (Y-axis) and whole-genome sequencing (X-axis), of focal events identified from whole-genome sequencing of undiluted VCaP DNA, illustrating the correlation and also the higher dynamic range of whole-genome sequencing.

(d) Detection of the AR amplicon in cell line VCaP undiluted (100%) and in a dilution series (50%, 20%, 5%, and 1%).

(e) Validation of copy numbers of three focally amplified genes (*AR*, left panel; *FGFR1* center panel; *MYC* right panel) using quantitative real-time PCR.

## Supplementary Tables

### Supplementary Table 1

Summary of clinical data of our prostate cancer patient cohort. WNR= within normal range;

NSE < 17: normale range; NA: not available

| Sample ID | Age (years) | Histology                | CRPC/CSPC | PSA (ng/ml) | NSE (ng/ml) | Therapy                        |
|-----------|-------------|--------------------------|-----------|-------------|-------------|--------------------------------|
| P2_1      | 73          | Adenocarcinoma           | CSPC      | 19,1        | WNR         | /                              |
| P10_1     | 67          | Adenocarcinoma           | CRPC      | 10,4        | WNR         | ADT                            |
| P19_1     | 69          | Adenocarcinoma           | CRPC      | 444,1       | WNR         | ADT                            |
| P19_2     |             |                          |           | 397,3       |             |                                |
| P19_3     |             |                          |           | 131,5       |             |                                |
| P29_1     | 73          | poorly differentiated PC | CSPC      | 394,0       | WNR         | /                              |
| P33_1     | 75          | poorly differentiated PC | CSPC      | 58,3        | WNR         | ADT                            |
| P40_1     | 83          | poorly differentiated PC | CSPC      | 773,7       | WNR         | ADT                            |
| P40_2     |             |                          | CRPC      | 656,0       |             |                                |
| P55_1     | 63          | Adenocarcinoma           | CRPC      | 49,2        | WNR         | ADT, Chemotherapy, Abiraterone |
| P59_1     | 62          | Adenocarcinoma           | CRPC      | 6471,1      | WNR         | NA                             |
| P59_2     |             |                          |           | 7532,5      |             |                                |
| P59_3     |             |                          |           | 6863,3      |             |                                |
| P65_1     | 73          | Adenocarcinoma           | CRPC      | 303,0       | WNR         | ADT, Chemotherapy              |
| P65_2     |             |                          |           | NA          |             |                                |
| P98_1     | /           | /                        | CRPC      | 35,6        | WNR         | RTX                            |
| P106_1    | 79          | Adenocarcinoma           | CRPC      | 761,5       | WNR         | ADT                            |
| P106_2    |             |                          |           | NA          |             |                                |
| P112_1    | 80          | Adenocarcinoma           | CSPC      | 146,9       | WNR         | No therapy applied             |
| P112_2    |             |                          |           | 31,5        |             | ADT                            |
| P116_1    | 85          | Adenocarcinoma           | CRPC      | 506,7       | WNR         | ADT                            |
| P116_2    |             |                          |           | 2489,0      |             | Abiraterone                    |
| P118_1    | 68          | Adenocarcinoma           | CRPC      | 1604,0      | WNR         | ADT                            |
| P118_2    |             |                          |           | 1689,0      |             |                                |
| P119_1    | 67          | poorly differentiated PC | CRPC      | 161,4       | WNR         | ADT                            |
| P120_1    | 68          | Adenocarcinoma           | CRPC      | 867,7       | WNR         | ADT, Chemotherapy              |
| P125_1    | 61          | Adenocarcinoma           | CRPC      | 58,8        | WNR         | ADT                            |
| P127_1    | 57          | Adenocarcinoma           | CRPC      | 2,8         | WNR         | ADT                            |
| P136_1    | 75          | Adenocarcinoma           | CRPC      | 208,2       | WNR         | ADT                            |
| P136_2    |             |                          |           | 254,9       |             |                                |

|        |    |                |      |       |      |                                   |
|--------|----|----------------|------|-------|------|-----------------------------------|
| P137_1 | 77 | Adenocarcinoma | CSPC | 5,5   | WNR  | ADT                               |
| P140_1 | 63 | Adenocarcinoma | CRPC | 593,0 | WNR  | ADT, Chemotherapy,<br>Abiraterone |
| P143_1 | 45 | Adenocarcinoma | CRPC | 0,0   | NA   | ADT, Chemotherapy                 |
| P143_2 |    |                |      | 0,2   |      | Abiraterone                       |
| P143_3 |    |                |      | 8,7   | >370 | Chemotherapy                      |
| P144_1 | 68 | Adenocarcinoma | CRPC | 34,2  | WNR  | ADT, Chemotherapy                 |
| P144_2 |    |                |      | 33,0  |      | Abiraterone                       |
| P147_1 | 60 | Adenocarcinoma | CRPC | 205,0 | NA   | ADT, Chemotherapy,<br>Abiraterone |
| P147_2 |    |                |      | 263,0 |      |                                   |
| P147_3 |    |                |      | 863,0 | >370 |                                   |

|        |    |                             |      |       |      |                                                 |
|--------|----|-----------------------------|------|-------|------|-------------------------------------------------|
| P148_1 | 63 | Adenocarcinoma              | CRPC | 694,0 | NA   | ADT, Chemotherapy                               |
| P148_2 |    |                             |      | 48,0  |      | Chemotherapy                                    |
| P148_3 |    |                             |      | 52,0  | >370 |                                                 |
| P151_1 | 66 | Adenocarcinoma              | CRPC | 471,0 | WNR  | ADT, Abiraterone                                |
| P151_2 |    |                             |      | 0,7   |      |                                                 |
| P151_3 |    |                             |      | 0,0   |      |                                                 |
| P152_1 | 69 | Adenocarcinoma              | CRPC | NA    | WNR  | ADT, Chemotherapy                               |
| P153_1 | 68 | Adenocarcinoma              | CRPC | 531,3 | WNR  | ADT                                             |
| P154_1 | 51 | Adenocarcinoma              | CRPC | NA    | WNR  | ADT                                             |
| P154_2 |    |                             |      | 67,7  |      | Abiraterone,<br>Enzalutamide                    |
| P154_3 |    |                             |      | 201,4 |      |                                                 |
| P154_4 |    |                             |      | 337,7 |      | Chemotherapy                                    |
| P155_1 | 67 | undiff.                     | CRPC | 134,0 | WNR  | ADT, Chemotherapy,<br>Abiraterone, Enzalutamide |
| P155_2 |    |                             |      | 124,6 |      |                                                 |
| P155_3 |    |                             |      | NA    |      |                                                 |
| P156_1 | 59 | poorly<br>differentiated PC | CRPC | 6,1   | WNR  | ADT, Abiraterone,<br>Chemotherapy               |
| P156_2 |    |                             |      | 3,2   |      |                                                 |
| P156_3 |    |                             |      | NA    |      |                                                 |
| P156_4 |    |                             |      | 2,2   |      |                                                 |
| P156_5 |    |                             |      | NA    |      |                                                 |
| P158_1 | 61 | Adenocarcinoma              | CRPC | 43,1  | WNR  | Abiraterone                                     |
| P158_2 |    |                             |      | 9,2   |      | Enzalutamide                                    |
| P158_3 |    |                             |      | 19,6  |      |                                                 |
| P158_4 |    |                             |      |       |      |                                                 |
| P159_1 | 54 | Adenocarcinoma              | CRPC | 319,5 | WNR  | ADT, Abiraterone                                |
| P159_2 |    |                             |      | 599,0 |      | Chemotherapy,<br>Enzalutamide                   |
| P162_1 | 72 | Adenocarcinoma              | CRPC | NA    | WNR  | ADT, Chemotherapy                               |
| P162_2 |    |                             |      | 69,9  |      | Abiraterone                                     |
| P164_1 | 69 | Adenocarcinoma              | CRPC | 292,7 | WNR  | RTX, Chemotherapy                               |
| P165_1 | 49 | Adenocarcinoma              | CRPC | 21,7  | WNR  | ADT, Chemotherapy                               |
| P165_2 |    |                             |      | 38,2  |      |                                                 |
| P167_1 | 56 | Adenocarcinoma              | CRPC | 593,2 | WNR  | ADT, Abiraterone                                |
| P167_2 |    |                             |      | 327,5 |      | Enzalutamide                                    |



|        |    |                |      |        |       |                                   |
|--------|----|----------------|------|--------|-------|-----------------------------------|
| P167_3 |    |                |      | NA     |       |                                   |
| P167_4 |    |                |      | 7570,0 |       | Chemotherapy                      |
| P167_5 |    |                |      | 7605,2 |       |                                   |
| P169_1 | 58 | Adenocarcinoma | CRPC | 595,8  | WNR   | ADT, Chemotherapy,<br>Abiraterone |
| P169_2 |    |                |      | 615,2  |       | Enzalutamide                      |
| P169_3 |    |                |      | 960,4  |       | Chemotherapy                      |
| P169_4 |    |                |      | 1244,4 |       |                                   |
| P170_1 | 63 | Adenocarcinoma | CRPC | 16,0   | NA    | ADT, Chemotherapy                 |
| P170_2 |    |                |      | 3,5    | 133,0 | Abiraterone                       |
| P170_3 |    |                |      | 2,6    | 14,2  | Chemotherapy                      |
| P170_4 |    |                |      | 3,6    | 13,8  |                                   |
| P178_1 | 62 | Adenocarcinoma | CRPC | 209,1  | WNR   | RTX, ADT                          |
| P178_2 |    |                |      | 196,1  |       | Abiraterone                       |
| P178_3 |    |                |      | 92,2   |       |                                   |

|        |    |                |      |       |       |                                                    |
|--------|----|----------------|------|-------|-------|----------------------------------------------------|
| P179_1 | 64 | Adenocarcinoma | CRPC | 0,4   | 59,0  | ADT                                                |
| P179_2 |    |                |      | NA    | NA    | RTX, Chemotherapy                                  |
| P179_3 |    |                |      |       |       |                                                    |
| P179_4 |    |                |      | 0,6   | 218,0 |                                                    |
| P181_1 | 66 | Adenocarcinoma | CRPC | 111,0 | WNR   | Abiraterone                                        |
| P181_2 |    |                |      | NA    |       |                                                    |
| P182_1 | 52 | glandular      | CRPC | 122,9 | WNR   | ADT, Abiraterone,<br>Chemotherapy,<br>Enzalutamide |
| P182_2 |    |                |      | 194,5 |       |                                                    |
| P182_3 |    |                |      |       |       |                                                    |

**Supplementary Table 2**

List of 74 cancer-related genes for which targeted resequencing was performed.

| <b>Genes</b> |
|--------------|
| AKAP9        |
| AKT1         |
| APC          |
| AR           |
| ARID1A       |
| ASXL1        |
| ATM          |
| AXIN1        |
| BAX          |
| BRAF         |
| BRCA1        |
| BRCA2        |
| BRIP1        |
| CDH1         |
| CDKN2A       |
| CDKN2B       |
| CHEK2        |
| CREBBP       |
| CTNNA1       |
| CTNNB1       |
| DAPK3        |
| EGFR         |
| EP300        |
| ERBB2        |
| FBXW7        |
| FGFR3        |
| FOXA1        |
| GATA3        |
| GATA4        |
| HNF1A        |
| HRAS         |
| KDM6A        |
| FOCAD        |
| KLF6         |
| KMT2D        |
| KRAS         |
| MAP2K4       |
| MDM2         |
| MED12        |
| MLH1         |
| KMT2A        |

|         |
|---------|
| KMT2C   |
| MLLT3   |
| MSH2    |
| MSH6    |
| MUTYH   |
| MYH9    |
| KAT6B   |
| NF1     |
| NOTCH1  |
| NRAS    |
| PALB2   |
| PDE4D   |
| PIK3CA  |
| PIK3R1  |
| PMS1    |
| PMS2    |
| PTCH1   |
| PTEN    |
| RAD51C  |
| RB1     |
| RUNX1   |
| SMAD4   |
| SMO     |
| SPOP    |
| STK11   |
| TMEM135 |
| TP53    |
| TRRAP   |
| UBR5    |
| VHL     |
| ZBTB7A  |
| TMPRSS2 |
| ERG     |
